# Supplementary material for: Long-Term Adverse Effects of Oxidative Stress on Rat Epididymis and Spermatozoa
Source: PubMed Central journal article supplement (PMC7070312; doi:10.3390/antiox9020170), 2020-02-19
Supplement: antioxidants-09-00170-s001.pdf [file antioxidants-09-00170-s001.pdf]

# Long-Term Adverse Effects of Oxidative Stress on Rat Epididymis and Spermatozoa

Pei You Wu, Eleonora Scarlata and Cristian O'Flaherty

Supplementary table S1 - Body and reproductive organs weight and sperm production

|         |          | <b>Body weight<br/>(g)</b> | <b>Testis (g)</b> | <b>Epididymis<br/>(g)</b> | <b>Ventral<br/>prostate<br/>(g)</b> | <b>Seminal<br/>vesicles<br/>(g)</b> | <b>Coagulating<br/>glands<br/>(g)</b> | <b>Sperm production<br/>(x10<sup>6</sup> spermatids/g<br/>testis)</b> |
|---------|----------|----------------------------|-------------------|---------------------------|-------------------------------------|-------------------------------------|---------------------------------------|-----------------------------------------------------------------------|
| 3 weeks | Control  | 511.75±10.70               | 1.84±0.04         | 0.64±0.03                 | 0.82±0.04                           | 0.82±0.08                           | 0.23±0.04                             | 164.50±17.00                                                          |
|         | tert-BHP | 542.00±10.86               | 1.77±0.05         | 0.69±0.06                 | 0.73±0.07                           | 0.65±0.06                           | 0.18±0.03                             | 154.00±9.50                                                           |
| 6 weeks | Control  | 577.00±10.86               | 1.81±0.10         | 0.70±0.02                 | 0.81±0.06                           | 0.62±0.08                           | 0.21±0.03                             | 151.75±12.90                                                          |
|         | tert-BHP | 610.50±11.14               | 1.87±0.06         | 0.69±0.03                 | 0.78±0.03                           | 0.54±0.06                           | 0.23±0.04                             | 148.63±15.40                                                          |
| 9 weeks | Control  | 556.75±24.24               | 1.82±0.10         | 0.67±0.03                 | 0.75±0.04                           | 0.71±0.11                           | 0.22±0.04                             | 150.68±9.00                                                           |
|         | tert-BHP | 666.50±18.77               | 1.88±0.04         | 0.74±0.02                 | 0.71±0.05                           | 0.66±0.05                           | 0.21±0.01                             | 143.43±15.6                                                           |

Body and organ weights were not different between the groups ( $n = 4$ , Two-Way ANOVA,  $p < 0.05$ ).
